# Supplementary material for: Mechanochromic Cu(i) boron imidazolate frameworks with low-dimensional structures and reducing function
Source: Royal Society of Chemistry journal article supplement (doi:10.1039/c5qi00155b), 2015-12-02
Supplement: c5qi00155b1.pdf [file c5qi00155b1.pdf]

*Electronic Supplementary Information (ESI) for*

**Mechanochromic Cu(I) Boron Imidazolate Frameworks with Low-dimensional structures and Reducing Function**

De-Xiang Zhang<sup>a,b</sup>, Hai-Xia Zhang<sup>b</sup>, Tian Wen<sup>\*,b</sup>, Dong-Sheng Li<sup>a</sup> and Jian Zhang<sup>\*,a,b</sup>

<sup>a</sup>College of Materials & Chemical Engineering, China Three Gorges University,  
Yichang 443002, P. R. China

<sup>b</sup>State Key Laboratory of Structural Chemistry, Fujian Institute of Research on the  
Structure of Mater, Chinese Academy of Science, 350002, Fuzhou, P. R. China

*China. E-mail: zhj@ffirms.ac.cn .E-mail: twen@ffirms.ac.cn .*

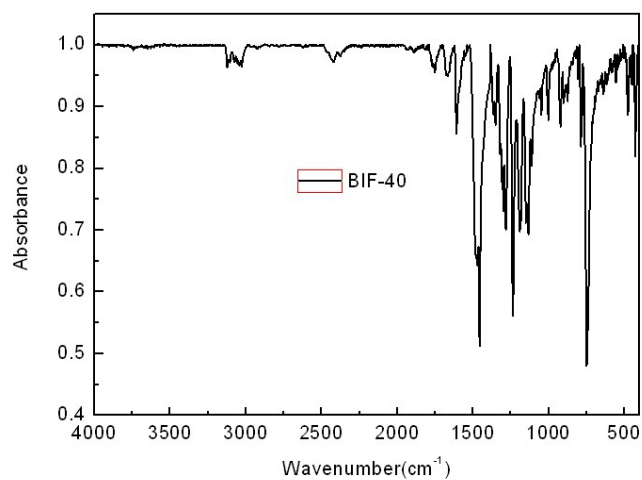

**Figure S1.** The FTIR spectra for **BIF-40**. IR spectrum (KBr pellets,  $\text{cm}^{-1}$ ): 3124.37(w), 3022.34(w), 2433.66(w), 1755.19(w), 1650.34(w), 1613.45(m), 1445.51(vs), 1279.99(vs), 1227.36(s), 1183.27(s), 1121.72(s), 1009.92(m), 904.06(m), 748.14(m), 469.89(m).

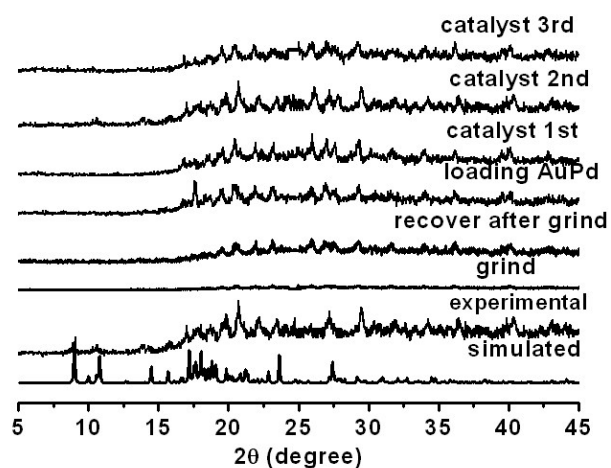

**Figure S2.** The PXRD patterns of **BIF-40** under different conditions.

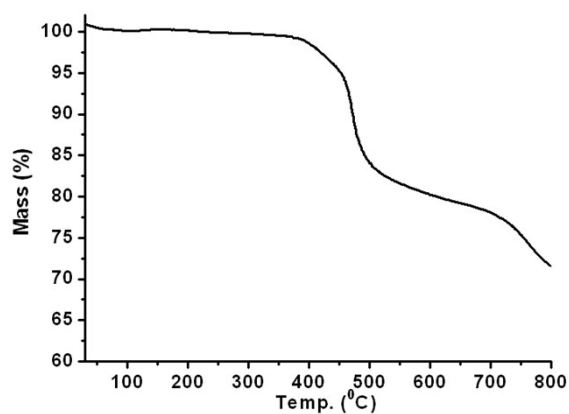

**Figure S3.** Thermogravimetric analysis of **BIF-40** sample.

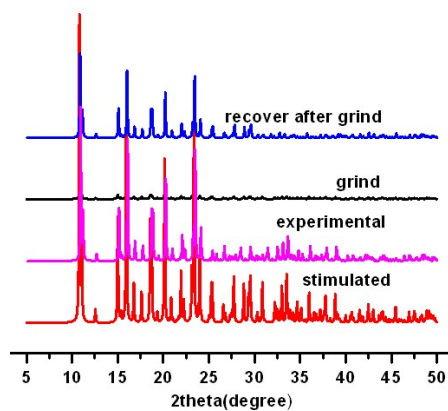

**Figure S4.** The PXRD patterns of **BIF-6** under different conditions.

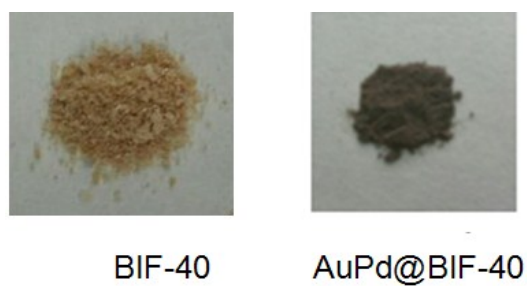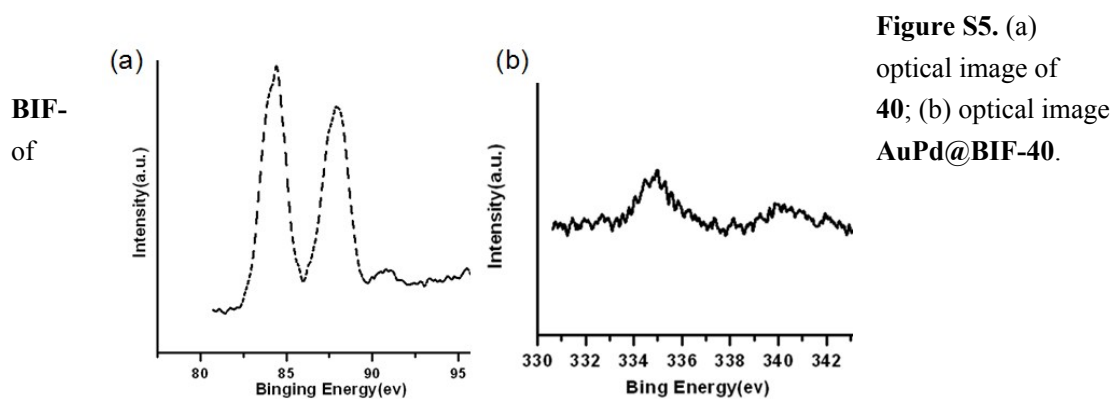

**Figure S5.** (a) optical image of **40**; (b) optical image **AuPd@BIF-40**.

**Figure S6.** (a) XPS spectrum of Au; (b) XPS spectrum of Pd.

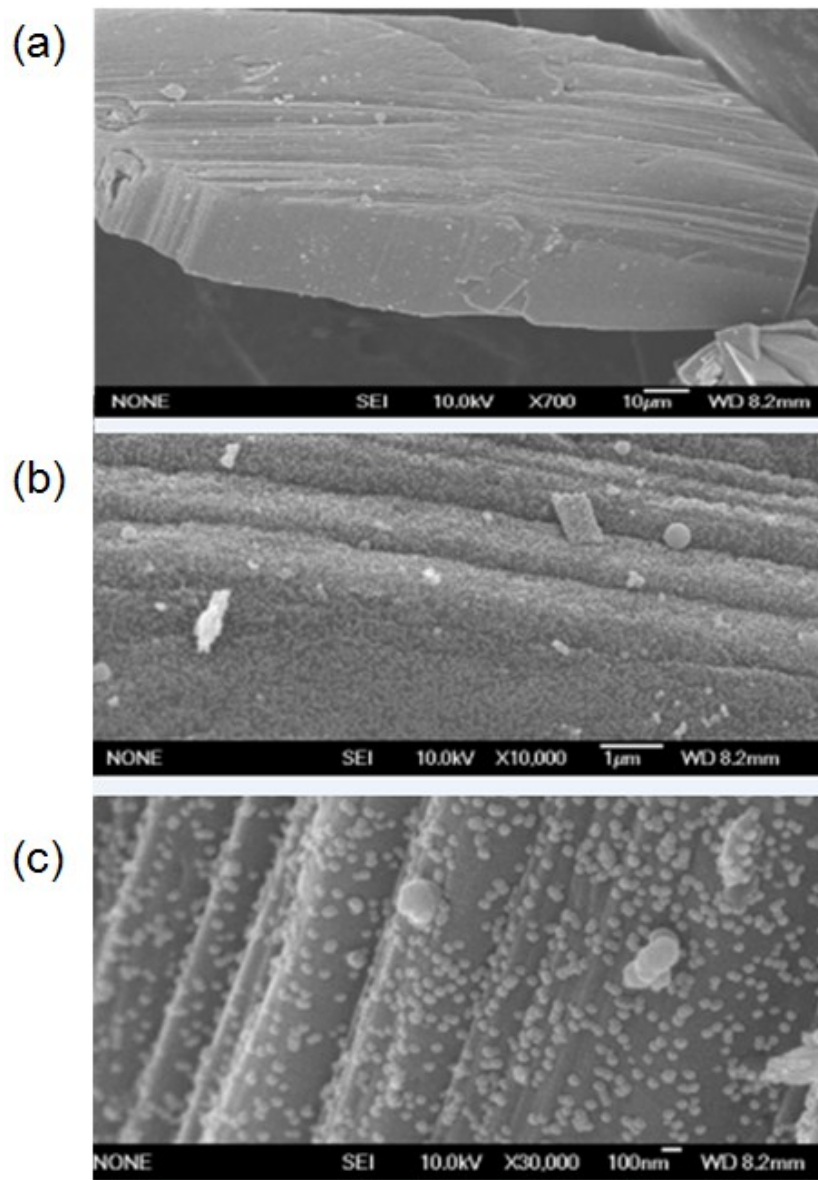

**Figure S7.** (a) (b) (c) Typical SEM images of the prepared **AuPd@BIF-40** with different magnifications.

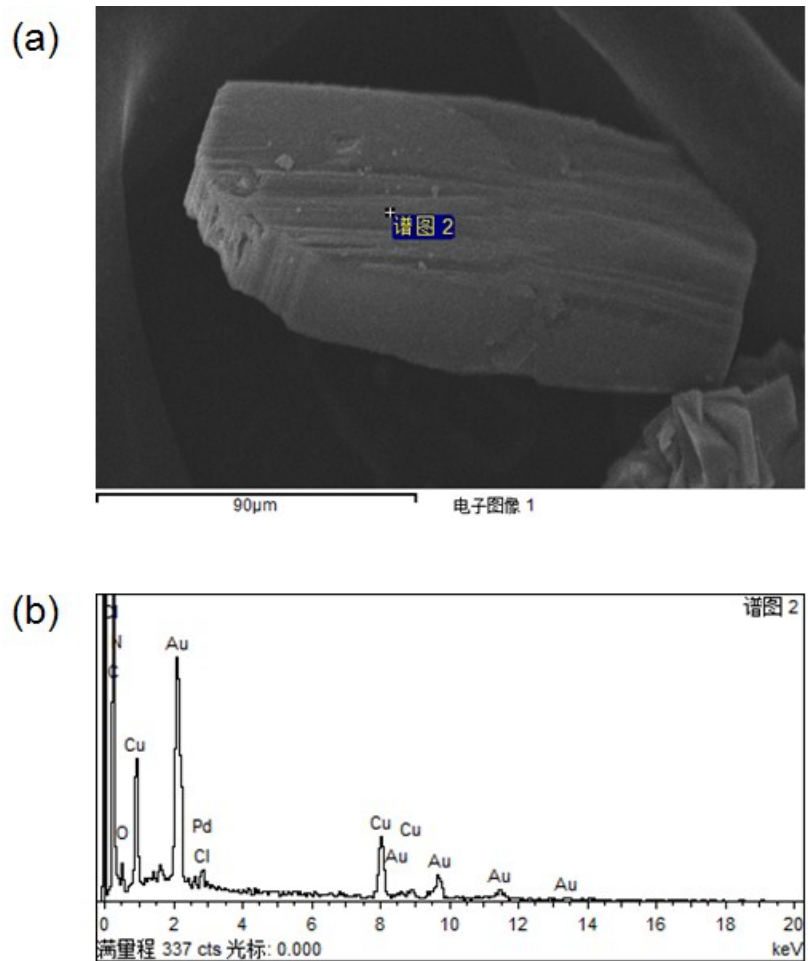

**Figure S8.** The SEM images and EDS spectrum of AuPd@BIF-40 mapping images.

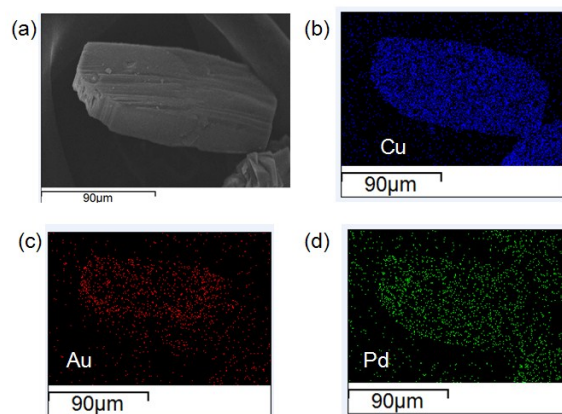

**Figure S9.** (a) The SEM images of AuPd@BIF-40 , (b) (c) (d) Mapping images of **Cu**, **Au** and **Pd**.

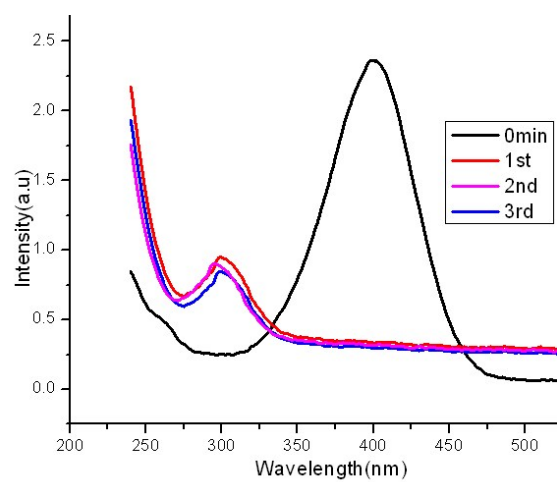

**Figure S10.** Recycling test on reduction of 4-NP over **AuPd@BIF-40**.

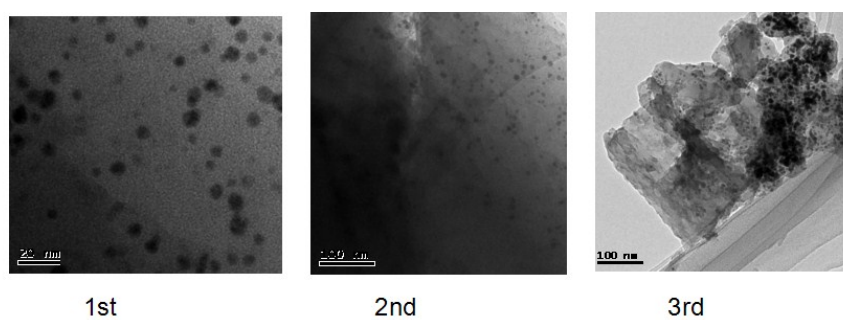

**Figure S11.** TEM images of **AuPd@BIF-40** after three times catalytic reaction.
